# Supplementary material for: Preparation of minor ginsenosides C-Mc, C-Y, F2, and C-K from American ginseng PPD-ginsenoside using special ginsenosidase type-I from Aspergillus niger g.848
Source: PubMed Central journal article supplement — J Ginseng Res. 2014 Dec 31;39(3):221–9. doi: 10.1016/j.jgr.2014.12.003 (PMC4506373; doi:10.1016/j.jgr.2014.12.003), 2014-12-31
Supplement: mmc1.pdf [file mmc1.pdf]

# Additional information of enzyme reaction products

## ginsenoside C-Mc, C-Y, F2 and C-K structure

### 1. $^1\text{H}$ and $^{13}\text{C}$ NMR spectrums of ginsenoside C-Mc

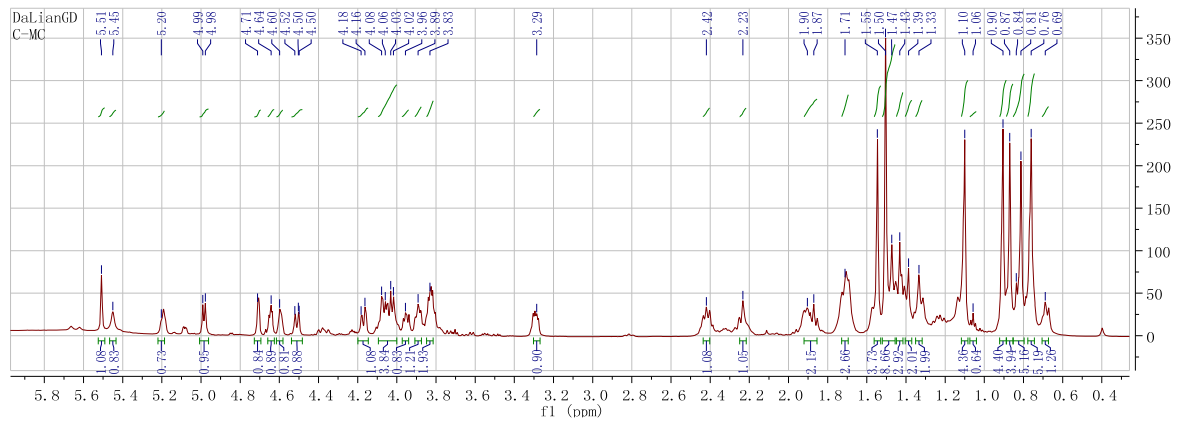

S. 1-1.  $^1\text{H}$  NMR (600 MHz,  $\text{CD}_3\text{OD}$ ) spectrum of ginsenoside C-Mc

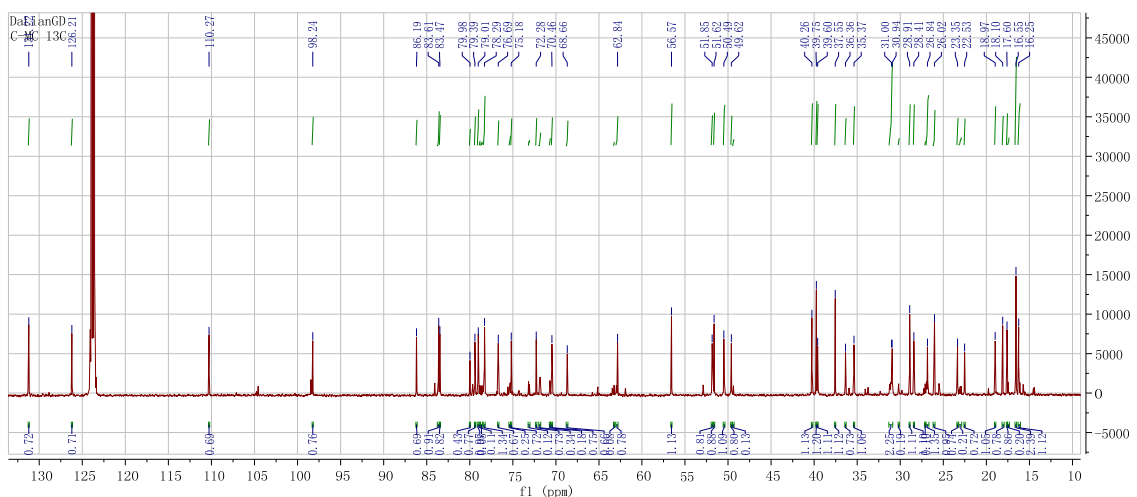

S.1-2.  $^{13}\text{C}$  NMR (150 MHz,  $\text{CD}_3\text{OD}$ ) spectrum of ginsenoside C-Mc

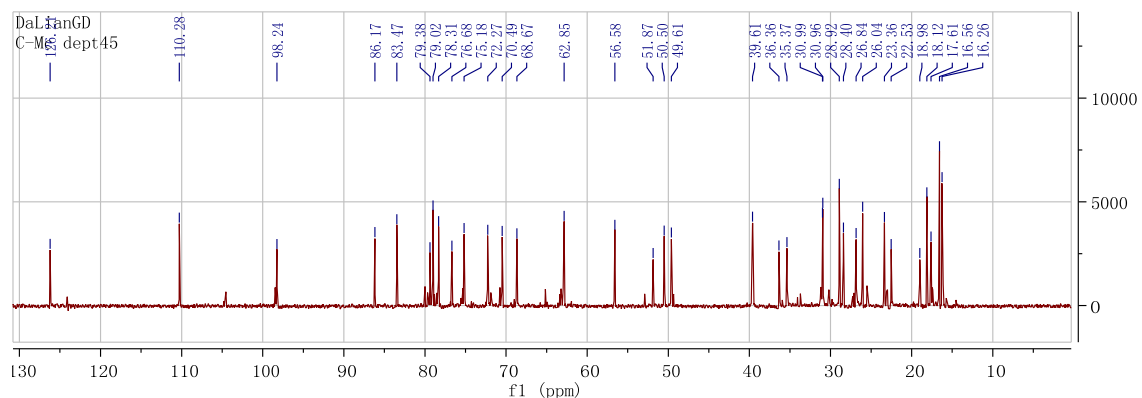

S. 1-3.  $^{13}\text{C}$  DEPT 45 NMR spectrum of ginsenoside C-Mc

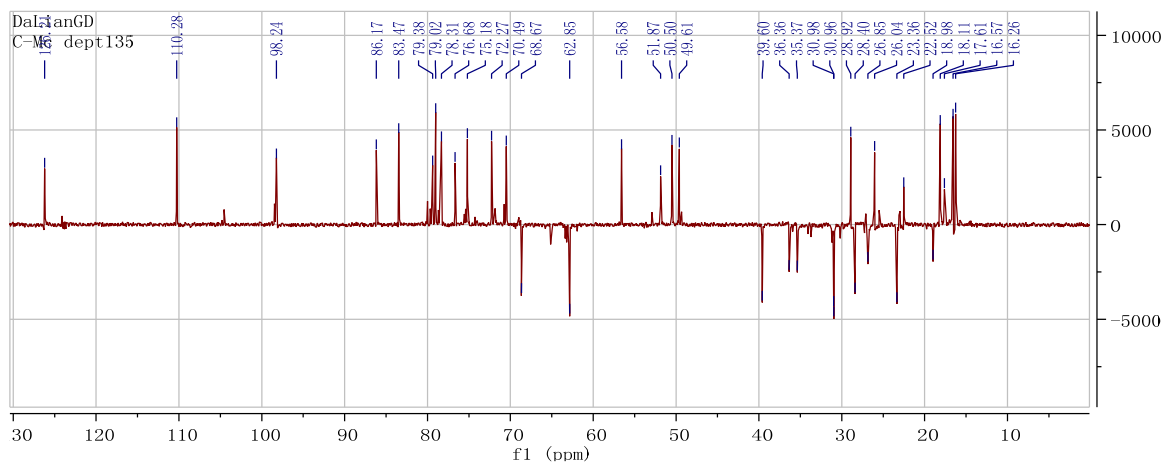

S. 1-4.  $^{13}\text{C}$  DEPT 135 NMR spectrum of ginsenoside C-Mc

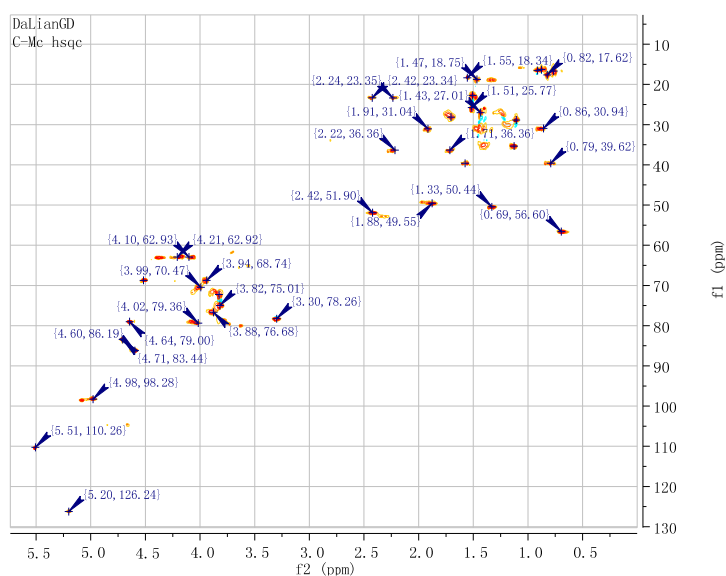

S. 1-5.  $^1\text{H}$ - $^{13}\text{C}$  HSQC spectrum of ginsenoside C-Mc

## 2. $^1\text{H}$ and $^{13}\text{C}$ NMR spectra of ginsenoside C-Y

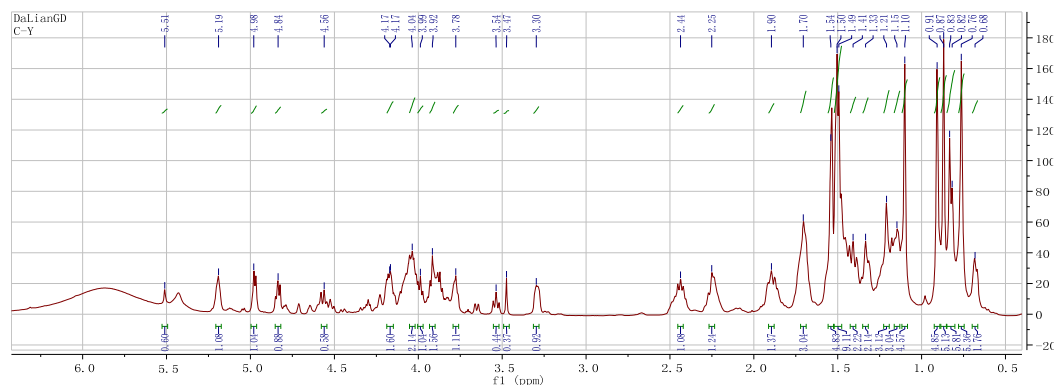

S. 2-1.  $^1\text{H}$  NMR (600 MHz,  $\text{CD}_3\text{OD}$ ) spectrum of ginsenoside C-Y

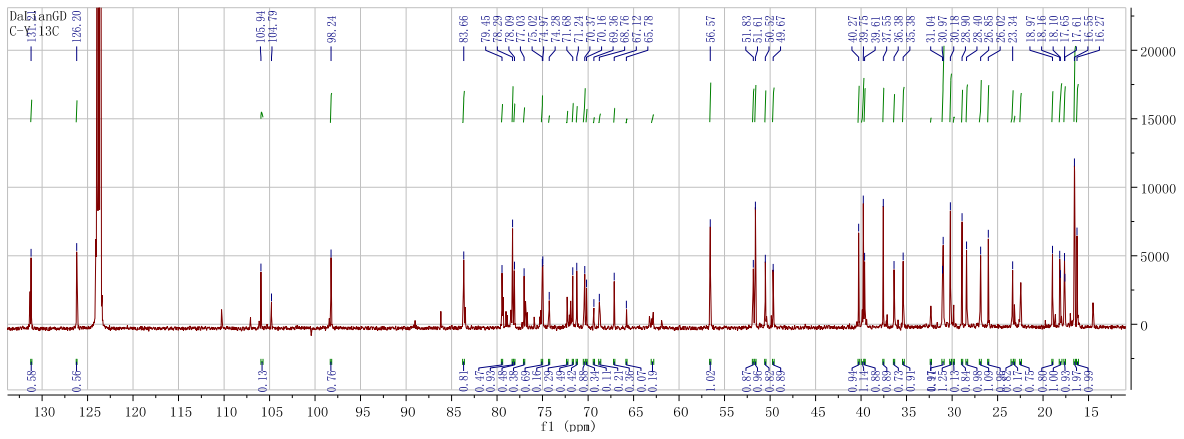

S. 2-2.  $^{13}\text{C}$  NMR (150 MHz,  $\text{CD}_3\text{OD}$ ) spectrum of ginsenoside C-Y

### 3. $^1\text{H}$ and $^{13}\text{C}$ NMR spectrums of ginsenoside F2

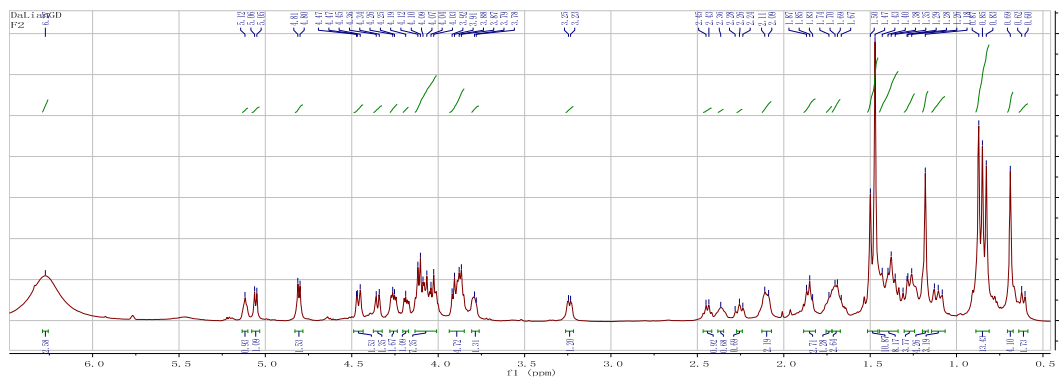

S. 3-1.  $^1\text{H}$  NMR (600 MHz,  $\text{CD}_3\text{OD}$ ) spectrum of ginsenoside F2

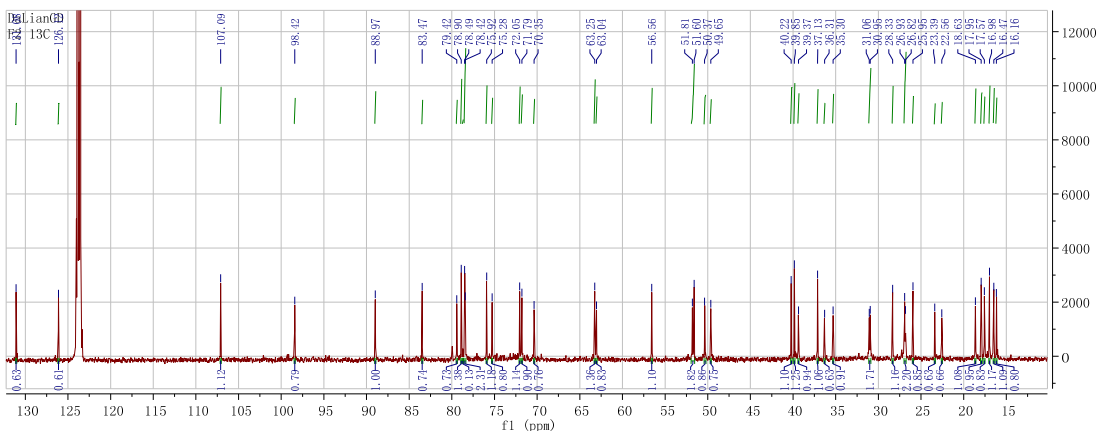

S. 3-2.  $^{13}\text{C}$  NMR (150 MHz,  $\text{CD}_3\text{OD}$ ) spectrum of ginsenoside F2

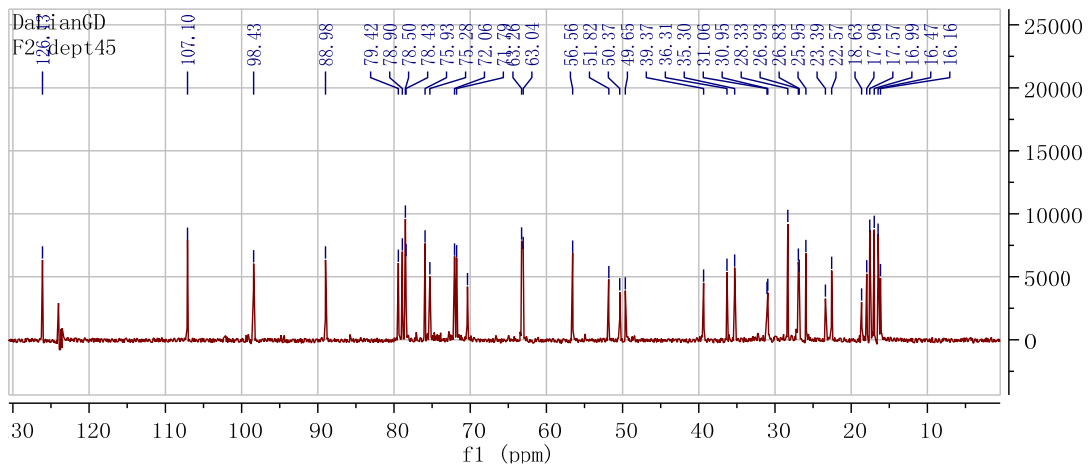

S. 3-3.  $^{13}\text{C}$  DEPT 45 NMR spectrum of ginsenoside F2

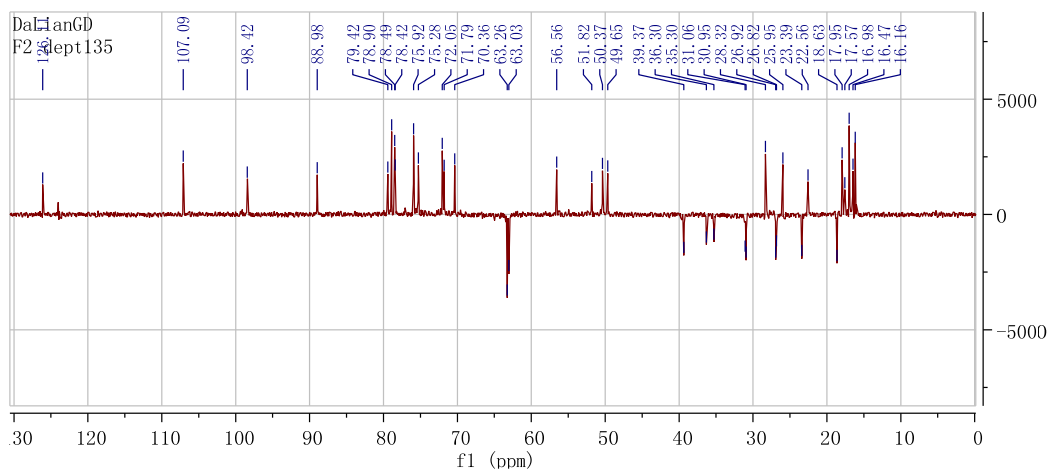

S. 3-4.  $^{13}\text{C}$  DEPT 135 NMR spectrum of ginsenoside F2

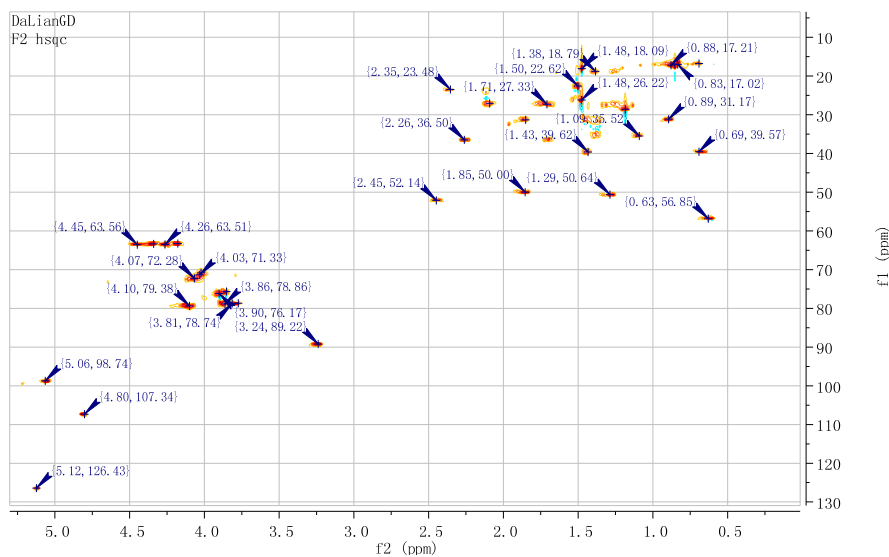

S. 3-5.  $^1\text{H}$ - $^{13}\text{C}$  HSQC spectrum of ginsenoside F2

#### 4. $^1\text{H}$ and $^{13}\text{C}$ NMR spectra of ginsenoside C-K



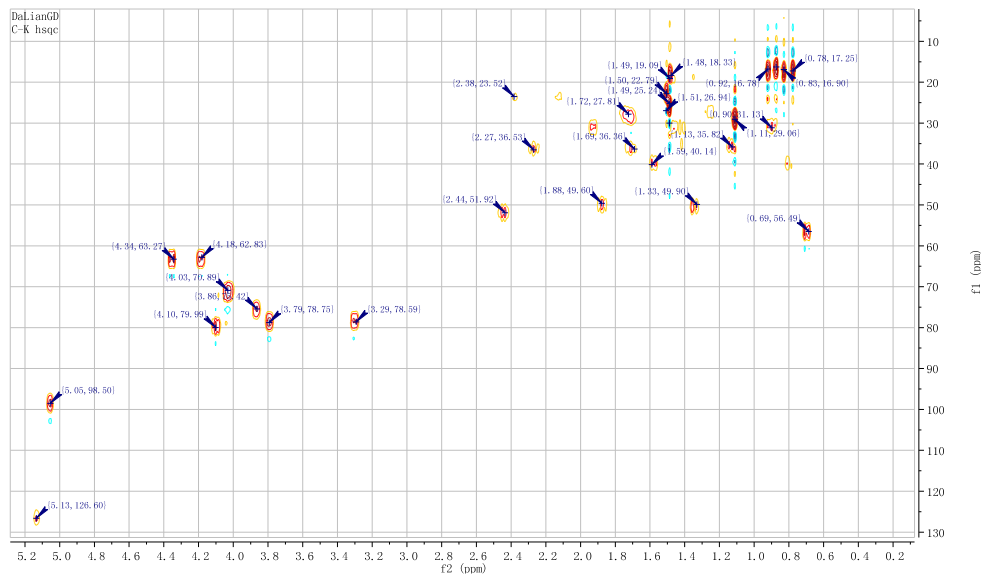

S. 4-5.  $^1\text{H}$ - $^{13}\text{C}$  HSQC spectrum of ginsenoside C-K
